# Supplementary material for: Sarcopenia in systemic sclerosis: prevalence and impact—a systematic review and meta-analysis
Source: HighWire-hosted journal article supplement (doi:10.1136/bmjopen-2023-078034), 2024-03-01

## **Sarcopenia in Systemic Sclerosis: Prevalence and Impact - A Systematic Review**

### **and Meta-analysis**

1. Table S1 Search strategy by Medline via Ovid SP
2. Table S2 Search strategy by Embase via Ovid SP
3. Table S3 Search strategy by Web of Science
4. Table S4 Search strategy by Cochrane Central Register of Controlled Trials via Ovid SP
5. Table S5 The reasons for the exclusion of full-text articles
6. Table S6 Characteristics of the included studies
7. Table S7 ARHQ Methodology Checklist for Cross-Sectional Study
8. Table S8 Newcastle-Ottawa Scale for Cohort study
9. Table S9 Meta-regression analyses of sarcopenia prevalence
10. Figure S1 Prevalence of sarcopenia by criteria
11. Figure S2 Prevalence of sarcopenia by disease subtype
12. Figure S3 Prevalence of sarcopenia by mean age
13. Figure S4 Sensitivity analysis
14. Figure S5 Egger's test for publication bias

**Table S1 Search strategy by Medline via Ovid SP**

- 
1. exp Scleroderma, Systemic/
  2. ((Systemic or general\* or diffus\* or progress\* or Limit\*) adj3 sclerosis).mp.
  3. scleroderm\*.tw.
  4. SSc.tw.
  5. 1 or 2 or 3 or 4
  6. exp muscular atrophy/
  7. (sarcopen\* or myopen\* or dynapon\* or amyotroph\* or myoatroph\* or myophagis\* or myodegenerat\*).mp.
  8. ((muscle or muscular) adj5 (atroph\* or wast\* or weak\* or loss\* or mass or degenerat\*)).ti,ab.
  9. 6 or 7 or 8
  10. 5 and 9
  11. exp animals/ not humans.sh.
  12. 10 not 11
-

**Table S2 Search strategy by Embase via Ovid SP**

- 
1. exp systemic sclerosis/
  2. ((Systemic or general\* or diffus\* or progress\* or Limit\*) adj3 sclerosis).mp.
  3. scleroderm\*.tw.
  4. SSc.tw.
  5. 1 or 2 or 3 or 4
  6. exp muscle atrophy/
  7. (sarcopen\* or myopen\* or dynapon\* or amyotroph\* or myoatroph\* or myophagis\* or myodegenerat\*).mp.
  8. ((muscle or muscular) adj5 (atroph\* or wast\* or weak\* or loss\* or mass or degenerat\*)).ti,ab.
  9. 6 or 7 or 8
  10. 5 and 9
  11. exp animal/
  12. human/
  13. 11 not 12
  14. 10 not 13
-

**Table S3 Search strategy by Web of Science**

Topic= (((Systemic or general\* or diffus\* or progress\* or Limit\*) near/3 sclerosis)  
or sclerodem or ssc) and (sarcopen\* or myopen\* or dynapon\* or amyotroph\* or  
myoatroph\* or myophagis\* or myodegenerat\* or ((muscle or muscular) near/5  
(atroph\* or wast\* or weak\* or loss\* or mass or degenerat\*)))

**Table S4 Search strategy by Cochrane Central Register of Controlled Trials via**

**Ovid SP**

- 
1. exp Scleroderma, Systemic/
  2. ((Systemic or general\* or diffus\* or progress\* or Limit\*) adj3 sclerosis).mp.
  3. scleroderm\*.tw.
  4. SSc.tw.
  5. 1 or 2 or 3 or 4
  6. exp muscular atrophy/
  7. (sarcopen\* or myopen\* or dynapon\* or amyotroph\* or myoatroph\* or myophagis\* or myodegenerat\*).mp.
  8. ((muscle or muscular) adj5 (atroph\* or wast\* or weak\* or loss\* or mass or degenerat\*)).ti,ab.
  9. 6 or 7 or 8
  10. 5 and 9
-

**Table S5 The reasons for the exclusion of full-text articles**

| Study            | Reason for the exclusion                                   |
|------------------|------------------------------------------------------------|
| Norman (2014)    | Repeated study                                             |
| Siebert (2014)   | Repeated study                                             |
| Caimmi (2017)    | Repeated study                                             |
| March (2017)     | Repeated study                                             |
| Doerfler (2017)  | Intervention study                                         |
| Paolino (2018)   | Repeated study                                             |
| Radic (2018)     | Not reported sarcopenia prevalence data<br>in SSc patients |
| Remolina (2019)  | Repeated study                                             |
| Sari (2019)      | Repeated study                                             |
| Veronica (2019)  | Repeated study                                             |
| Hax (2020)       | Repeated study                                             |
| Santo (2020)     | Repeated study                                             |
| Sangaroon (2020) | Repeated study                                             |
| Peterson (2020)  | Not reported sarcopenia prevalence data<br>in SSc patients |
| Efremova (2021)  | Repeated study                                             |
| Sorokina (2022)  | Not reported sarcopenia prevalence data<br>in SSc patients |

Table S6 Characteristics of the included studies

| First author and year | Country   | Study design               | Sample size | Mean age(years) | Female, n | Disease subtype          | Disease duration (years) | SSc diagnostic criteria | Sarcopenia diagnostic criteria | Criteria (assessment method of detecting sarcopenia) | Prevalence of sarcopenia |              |
|-----------------------|-----------|----------------------------|-------------|-----------------|-----------|--------------------------|--------------------------|-------------------------|--------------------------------|------------------------------------------------------|--------------------------|--------------|
|                       |           |                            |             |                 |           |                          |                          |                         |                                |                                                      | Total,n(%)               | Diffuse,n(%) |
| Caimmi (2018)         | Italy     | Cross-sectional study      | 140         | 64              | 118       | limited 97<br>diffuse 43 | 12.8                     | 2013<br>ACR/EULAR       | SMI                            | LMM (DXA)                                            | 29(20.7%)                | 11(7.9%)     |
| Siebert (2018)        | Germany   | Cross-sectional study      | 129         | 60              | 118       | -                        | 7                        | 2013<br>ACR/EULAR       | EWGSOP (2010)                  | LMM (BIA)<br>LMS (HGS)                               | 29(22.5%)                | -            |
| Corallo (2019)        | Italy     | Cross-sectional study      | 62          | 62              | 54        | limited 50<br>diffuse 12 | 8                        | 2013<br>ACR/EULAR       | EWGSOP (2010)                  | LMM (DXA)                                            | 26(42%)                  | 4(6.4%)      |
| Rincon (2019)         | Argentina | Cross-sectional study      | 27          | 52.5            | 20        | limited 16<br>diffuse 11 | 7.8                      | 2013<br>ACR/EULAR       | EWGSOP (2010)                  | LMM (DXA)<br>LMS (HGS)<br>LPP (4mGS)                 | 9(33.3%)                 | 3(11.1%)     |
| Paolino (2020)        | Italy     | Retrospective cohort study | 43          | 64.1            | 36        | -                        | 10.2                     | 2013<br>ACR/EULAR       | EWGSOP (2010)                  | LMM (DXA)                                            | 10(23.3%)                | -            |
| Hax (2021)            | Brazil    | Cross-sectional study      | 94          | 60.5            | 87        | -                        | 12.5                     | 2013<br>ACR/EULAR       | EWGSOP (2019)                  | LMM (DXA)<br>LMS (HGS)<br>LPP (SPPB)                 | 15(15.9%)                | -            |
| Sari (2021)           | Turkey    | Cross-sectional            | 93          | 52.6            | 86        | -                        | 10.7                     | 1980ACR                 | EWGSOP                         | LMM (BIA)                                            | 10(10.7%)                | -            |

| First author and year | Country  | Study design          | Sample size | Mean age(years) | Female, n | Disease subtype       | Disease duration (years) | SSc diagnostic criteria | Sarcopenia diagnostic criteria | Criteria (assessment method of detecting sarcopenia) | Prevalence of sarcopenia |              |
|-----------------------|----------|-----------------------|-------------|-----------------|-----------|-----------------------|--------------------------|-------------------------|--------------------------------|------------------------------------------------------|--------------------------|--------------|
|                       |          |                       |             |                 |           |                       |                          |                         |                                |                                                      | Total,n(%)               | Diffuse,n(%) |
| Efremova (2022)       | Russia   | Cross-sectional study | 47          | 53.9            | 47        | limited 29 diffuse 18 | 6                        | 2013 ACR/EULAR          | (2010)                         | LMS (HGS)                                            | 10(21.3%)                | 6(12.8%)     |
|                       |          |                       |             |                 |           |                       |                          |                         |                                | LMM (DXA)                                            |                          |              |
|                       |          |                       |             |                 |           |                       |                          |                         | EWGSOP (2019)                  | LMS (HGS and Chair rising test)                      |                          |              |
| Sangaroon (2022)      | Thailand | Cross-sectional study | 180         | 58.8            | 119       | limited 86 diffuse 94 | 6.2                      | -                       |                                | LPP (GS and SPPB)                                    | 41(22.8%)                | 30(16.7%)    |
|                       |          |                       |             |                 |           |                       |                          |                         | AWGS (2019)                    | LMM(DXA)                                             |                          |              |
|                       |          |                       |             |                 |           |                       |                          |                         |                                | LMS(HGS) LPP(GS)                                     |                          |              |

ACR, American College of Rheumatology; EULAR, European League against Rheumatology classification criteria; SMI, Skeletal Muscle Mass Index; EWGSOP, European Working Group on Sarcopenia in Old People; HGS, hand grip strength; 4mGS, 4 m gait speed; SPPB, Short Physical Performance Battery; GS, gait speed; AWGS, Asian Working Group for Sarcopenia.



**Table S7 ARHQ Methodology Checklist for Cross-Sectional Study**

| Study            | Item 1  | Item 2 | Item 3  | Item 4  | Item 5  | Item 6 | Item 7 | Item 8 | Item 9  | Item 10 | Item 11 | Total Score |
|------------------|---------|--------|---------|---------|---------|--------|--------|--------|---------|---------|---------|-------------|
| Caimmi (2018)    | Yes     | Yes    | Yes     | Yes     | Unclear | Yes    | No     | No     | Unclear | Yes     | No      | 6           |
| Siegert (2018)   | Yes     | Yes    | Unclear | Yes     | Unclear | Yes    | No     | No     | No      | Yes     | No      | 5           |
| Corallo (2019)   | Yes     | Yes    | Yes     | Yes     | Unclear | Yes    | No     | No     | No      | Yes     | No      | 6           |
| Rincon (2019)    | Yes     | Yes    | Unclear | Unclear | Unclear | Yes    | No     | No     | No      | Yes     | No      | 4           |
| Hax (2021)       | Yes     | Yes    | Yes     | Yes     | Unclear | Yes    | Yes    | No     | Yes     | Yes     | No      | 8           |
| Sari (2021)      | Yes     | Yes    | Yes     | Yes     | Unclear | Yes    | No     | No     | No      | Yes     | No      | 6           |
| Efremova (2022)  | Unclear | Yes    | Unclear | Unclear | Unclear | Yes    | No     | No     | No      | Yes     | No      | 3           |
| Sangaroon (2022) | Yes     | Yes    | Yes     | Yes     | Unclear | Yes    | No     | No     | No      | Yes     | No      | 6           |

Item 1. Define the source of information (survey, record review)

Item 2. List inclusion and exclusion criteria for exposed and unexposed subjects (cases and controls) or refer to previous publications

Item 3. Indicate time period used for identifying patients

Item 4. Indicate whether or not subjects were consecutive if not population-based

Item 5. Indicate if evaluators of subjective components of study were masked to other aspects of the status of the participants

Item 6. Describe any assessments undertaken for quality assurance purposes (e.g., test/retest of primary outcome measurements)

Item 7. Explain any patient exclusions from analysis

Item 8. Describe how confounding was assessed and/or controlled

Item 9. If applicable, explain how missing data were handled in the analysis

Item 10. Summarize patient response rates and completeness of data collection

Item 11. Clarify what follow-up, if any, was expected and the percentage of patients for which incomplete data or follow-up was obtained

Table S8 Newcastle-Ottawa Scale for Cohort study

| Study          | Selection                                |                                     |                           |                                                                          | Comparability                                                   | Outcome               |                                                 |                                  | Total Score |
|----------------|------------------------------------------|-------------------------------------|---------------------------|--------------------------------------------------------------------------|-----------------------------------------------------------------|-----------------------|-------------------------------------------------|----------------------------------|-------------|
|                | Representativeness of the exposed cohort | Selection of the non-exposed cohort | Ascertainment of exposure | Demonstration that outcome of interest was not present at start of study | Comparability of cohorts on the basis of the design or analysis | Assessment of outcome | Was follow-up long enough for outcomes to occur | Adequacy of follow up of cohorts |             |
| Paolino (2020) | 0                                        | 1                                   | 1                         | 0                                                                        | 1                                                               | 1                     | 0                                               | 0                                | 4           |

Table S9 Meta-regression analyses of sarcopenia prevalence

| Variables            | Coefficient | SE     | P value | CI-Lower | CI-Upper |
|----------------------|-------------|--------|---------|----------|----------|
| Sample size          | -0.0022     | 0.0026 | 0.424   | -0.0083  | 0.0039   |
| Average age          | 0.0210      | 0.0319 | 0.532   | -0.0545  | 0.0965   |
| Proportion of female | -1.0603     | 1.3233 | 0.449   | -4.1893  | 2.0687   |
| Duration of SSc      | -0.0606     | 0.0488 | 0.255   | -0.1760  | 0.0549   |

Figure S1 Prevalence of sarcopenia by criteria

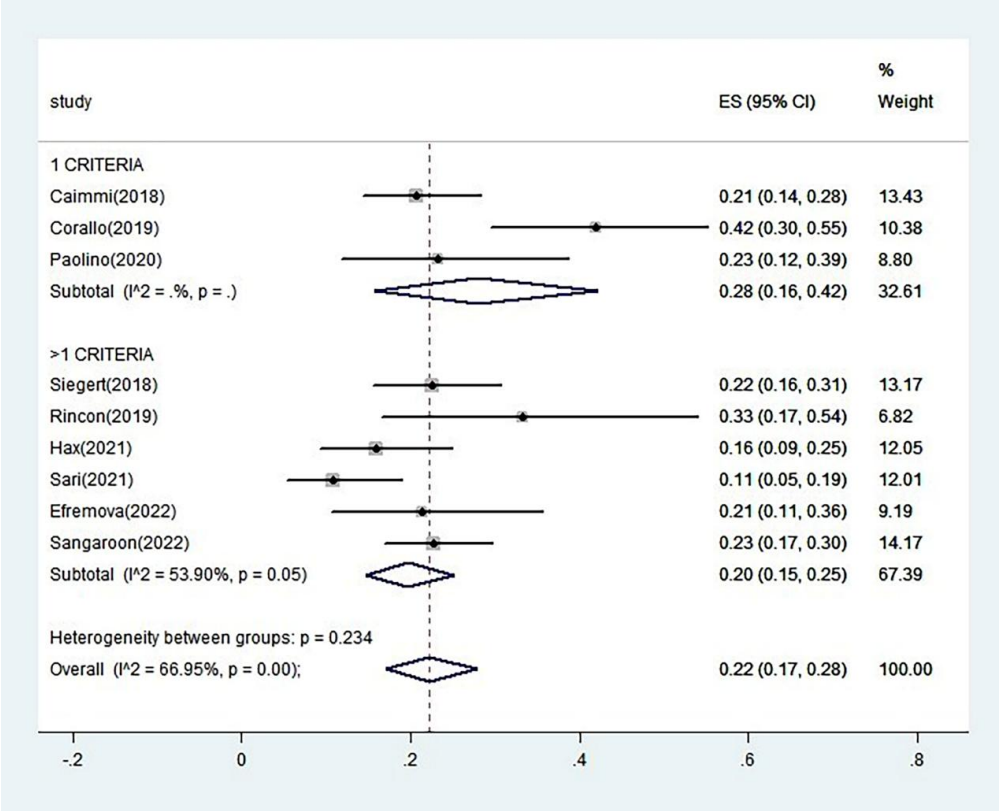

ES = effect size (prevalence);  $I^2 = I^2$  heterogeneity statistic. A random effects model was used for analysis, and there was no significant difference between subgroups ( $P = 0.234$ ).

Figure S2 Prevalence of sarcopenia by disease subtype

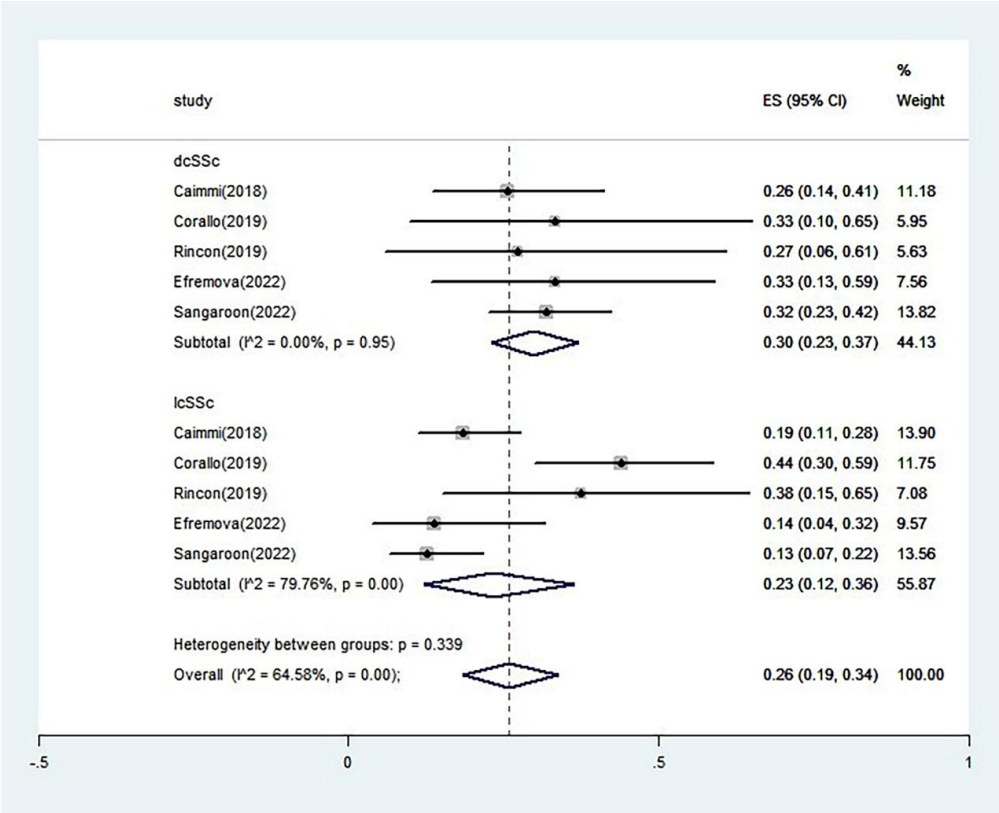

ES = effect size (prevalence); I² = I² heterogeneity statistic. The random effects model was used for the analysis, and there was no significant difference between the subgroups (P = 0.339).

Figure S3 Prevalence of sarcopenia by mean age

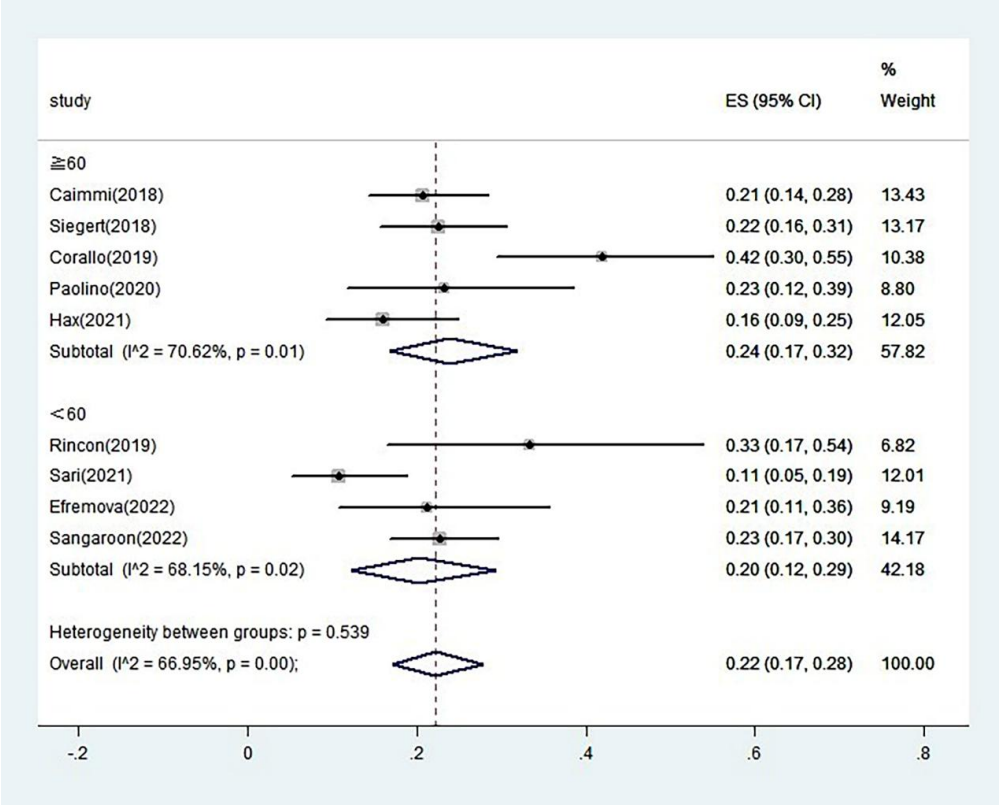

ES = effect size (prevalence);  $I^2 = I^2$  heterogeneity statistic. The random effects model was used for the analysis, and there was no significant difference between the subgroups ( $P = 0.539$ ).

Figure S4 Sensitivity analysis

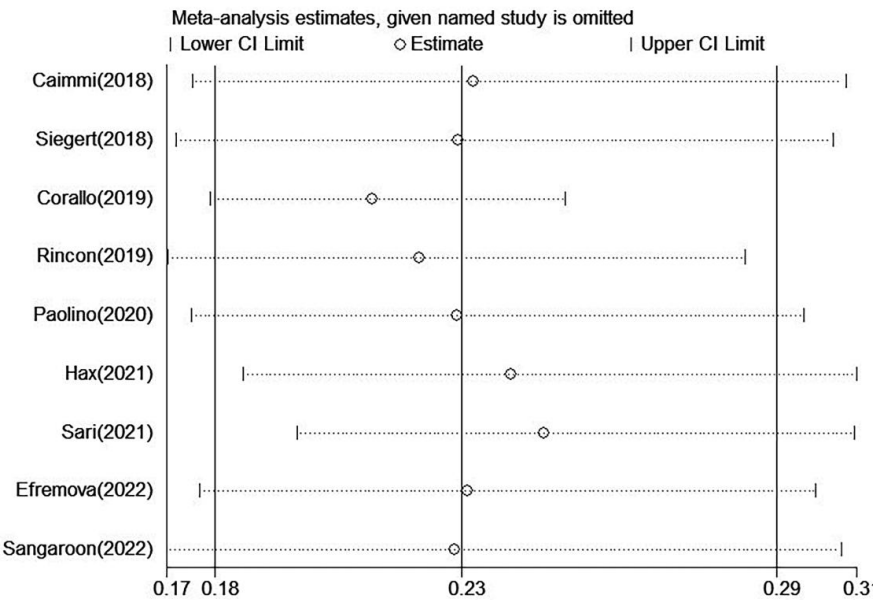

Figure S5 Egger’s test for publication bias

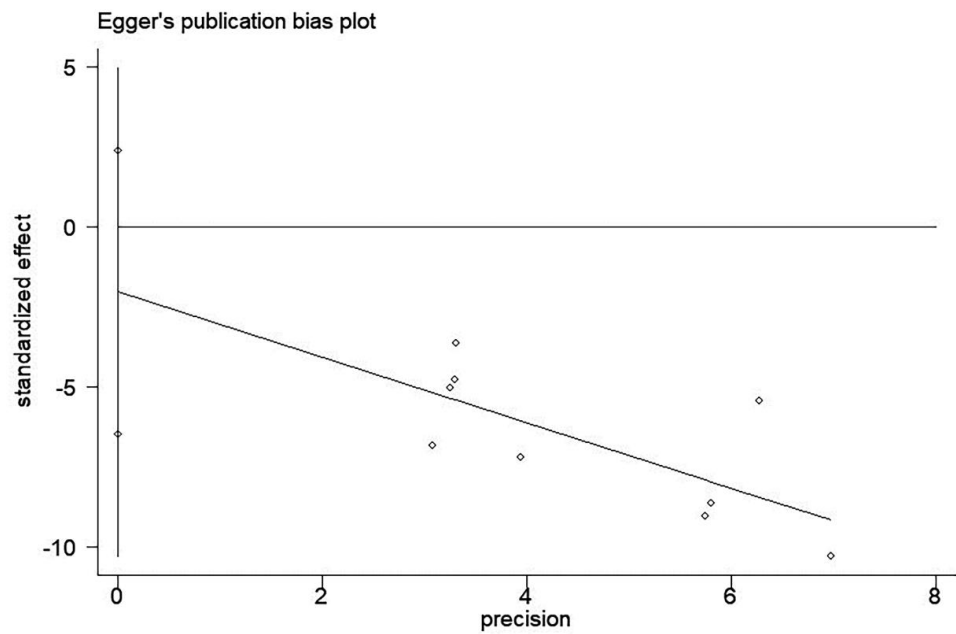

Supplement: bmjopen-2023-078034supp001_data_supplement.pdf [file bmjopen-2023-078034supp001_data_supplement.pdf]
